# Supplementary material
Source: PubMed Central journal article supplement (PMC6835071)
Supplement: rccm.201806-1100OC_schweitzer_data_supplement.pdf [file rccm.201806-1100OC_schweitzer_data_supplement.pdf]

## **Online Repository Data Supplement**

### **Solriamfetol for Excessive Sleepiness in Obstructive Sleep Apnea (TONES 3):**

#### **A Randomized Controlled Trial**

Paula K. Schweitzer<sup>1</sup>, Russell Rosenberg<sup>2,3</sup>, Gary K. Zammit<sup>4,5</sup>, Mark Gotfried<sup>6</sup>, Dan Chen<sup>7</sup>,  
Lawrence P. Carter<sup>7,8</sup>, Hao Wang<sup>7</sup>, Yuan Lu<sup>7</sup>, Jed Black<sup>7,9</sup>, Atul Malhotra<sup>10</sup>, and Kingman P.  
Strohl<sup>11</sup>

<sup>1</sup>Sleep Medicine and Research Center, St. Luke's Hospital, Chesterfield, Missouri; <sup>2</sup>NeuroTrials  
Research, Atlanta, Georgia; <sup>3</sup>Atlanta School of Sleep Medicine, Atlanta, Georgia; <sup>4</sup>Clinilabs  
Drug Development Corporation, New York, New York; <sup>5</sup>Icahn School of Medicine at Mount  
Sinai, New York, New York; <sup>6</sup>Pulmonary Associates, PA, Phoenix, Arizona; <sup>7</sup>Jazz  
Pharmaceuticals, Palo Alto, California; <sup>8</sup>University of Arkansas for Medical Sciences, Little  
Rock, Arkansas; <sup>9</sup>Stanford Center for Sleep Sciences and Medicine, Palo Alto, California;  
<sup>10</sup>University of California, San Diego, California; and <sup>11</sup>Case Western Reserve University,  
Cleveland, Ohio

**Table E1.** Change in Polysomnography Parameters From Baseline to Week 12 (modified intent-to-treat population)

| Parameter                 | Least squares mean change (standard error) |                                             |                                           |                                             |                                             |
|---------------------------|--------------------------------------------|---------------------------------------------|-------------------------------------------|---------------------------------------------|---------------------------------------------|
|                           | Placebo<br>( <i>n</i> = 114)               | Solriamfetol<br>37.5 mg<br>( <i>n</i> = 56) | Solriamfetol<br>75 mg<br>( <i>n</i> = 58) | Solriamfetol<br>150 mg<br>( <i>n</i> = 116) | Solriamfetol<br>300 mg<br>( <i>n</i> = 115) |
| Total sleep time, minutes | 0.4 (5.9)                                  | 6.8 (8.5)                                   | -11.4 (8.1)                               | -12.4 (5.8)                                 | -9.5 (6.2)                                  |
| <i>P</i> vs placebo       | —                                          | 0.5353                                      | 0.2355                                    | 0.1208                                      | 0.2421                                      |
| WASO, minutes             | 1.5 (4.1)                                  | -2.7 (5.9)                                  | 4.1 (5.7)                                 | 6.7 (4.1)                                   | -4.5 (4.3)                                  |
| <i>P</i> vs placebo       | —                                          | 0.5501                                      | 0.7128                                    | 0.3685                                      | 0.3076                                      |
| Number of awakenings      | 0.5 (5.4)                                  | 0.1 (4.5)                                   | -0.5 (4.3)                                | 0.3 (5.6)                                   | -0.1 (6.4)                                  |
| <i>P</i> vs placebo       | —                                          | 0.9240                                      | 0.1959                                    | 0.4852                                      | 0.1879                                      |

WASO = Wake time after sleep onset.

## **Study Investigators**

### **Canada**

Dr. Adam Blackman, Toronto Sleep Institute; Dr. Charles George, London Health Sciences Centre; Dr. Colin Shapiro, International Sleep Clinic; Dr. Colin Shapiro, Pediatric Sleep Research Inc.

### **Germany**

Dr. Heike Benes, Somni bene GmbH Institut für Medizinische Forschung; Dr. Ingo Fietze, Advanced Sleep Research GmbH; Dr. Geert Mayer, Studienzentrum Wilhelmshoehe; Dr. Peter Young, Universitätsklinikum Münster Department für Neurologie

### **Netherlands**

Dr. Gert Jan Lammers, Sleep Wake Center SEIN

### **United States**

Dr. Mansoor Ahmed, Cleveland Sleep Research Center; Dr. Akinyemi Ajayi, Florida Pediatric Research Institute; Dr. James Andry, Sleep Therapy and Research Center; Dr. Roy Artal, So Cal Institute for Respiratory Diseases, Inc; Dr. Bijan Bastani, NorthCoast Clinical Trials Inc; Dr. Richard Bogan, Sleep Med of South Carolina Clinical Research Solutions; Dr. Bruce Corser, Sleep Management Institute; Dr. Christopher Drake, Henry Ford Hospital Sleep Disorders and Research Center; Dr. Helene Emsellem, The Center for Sleep and Wake Disorders; Dr. Milton Erman, Pacific Sleep Medicine; Dr. Neil Feldman, Clinical Research Group of St Petersburg;

Dr. Nancy Foldvary, Cleveland Clinic; Dr. Mark Gotfried, Pulmonary Associates; Dr. John Hudson, FutureSearch Trials of Neurology LP; Dr. Lois Krahn, Mayo Clinic in Arizona; Dr. Daniel Lorch, PAB Clinical Research; Dr. Atul Malhotra, UC San Diego Medical Center; Dr. James Maynard, CTI Clinical Research Center; Dr. Emmanuel Mignot, Stanford University Center for Narcolepsy; Dr. Michael Neeb, Mercy Sleep Center; Dr. Joseph Ojile, Clayton Sleep Institute; Dr. Alvin Thomas Perkins, Raleigh Neurology Associates; Dr. Russell Rosenberg, NeuroTrials Research Inc; Dr. Asim Roy, Ohio Sleep Medicine and Neuroscience Institute; Dr. Pradeep Sahota, University of Missouri; Dr. R. Bart Sangal, Clinical Neurophysiology Services; Dr. Andrew Schreiber, SDS Clinical Trials, Inc; Dr. Paula Schweitzer, Sleep Medicine and Research Center, St. Luke's Hospital; Dr. Ralph Steele, Minnesota Lung Center; Dr. Thomas Stern, ARSM Research, LLC; Dr. Thomas Stern, Hickory Research Center; Dr. Sarah Stolz, Swedish Medical Center; Dr. Kingman Strohl, University Hospitals Case Medical Center; Dr. Todd Swick, Todd J. Swick MD PA; Dr. Stephen G. Thein, Pacific Research Network Inc; Dr. Robert Thomas, Neurocare, Inc; Dr. Michael Thorpy, Montefiore Medical Center; Dr. Terri Weaver, University of Illinois at Chicago College of Nursing; Dr. Kerri Wilks, MD Clinical; Dr. David Winslow, Kentucky Research Group; Dr. Paul Wylie, Preferred Research Partners; Dr. Gary Zammit, Clinilabs; Dr. Phyllis Zee, Northwestern University Feinberg School of Medicine
